# Spatially specific expression of *Hoxb4* is dependent on the ubiquitous transcription factor NFY

Jonathan Gilthorpe<sup>1,\*,\u0394</sup>, Marie Vandromme<sup>1,\u2197,\u0394</sup>, Tim Brend<sup>1,\u2197</sup>, Alejandro Gutman<sup>1</sup>, Dennis Summerbell<sup>1,\u2197</sup>, Nick Totty<sup>2,\u2197</sup> and Peter W. J. Rigby<sup>1,\u2197,\*\*</sup>

<sup>1</sup>Division of Eukaryotic Molecular Genetics, MRC National Institute for Medical Research, The Ridgeway, Mill Hill, London NW7 1AA, UK

<sup>2</sup>Ludwig Institute for Cancer Research, 91 Riding House Street, London W1W 7BS, UK

\*Present address: Department of Developmental Neurobiology, King's College London, Guy's Campus, London Bridge, London SE1 1UL, UK

<sup>\u2197</sup>Present address: Laboratoire de Biologie Molculaire et Cellulaire, UMR 5665 CNRS/ENS Lyon, 46 Allée d'Italie, 69364 Lyon Cedex 07, France

<sup>\u2197</sup>Present address: Section of Gene Function and Regulation, The Institute of Cancer Research, Chester Beatty Laboratories, 237 Fulham Road, London SW3 6JB, UK

<sup>\u2197</sup>Present address: Protein Analysis Laboratory, Cancer Research UK, PO Box 123, Lincoln's Inn Fields, London WC2A 3PX, UK

<sup>\u2197</sup>These authors contributed equally to this article and should both be considered first authors

\*\*Author for correspondence (e-mail: p.rigby@icr.ac.uk)

Accepted 22 May 2002

## SUMMARY

Understanding how boundaries and domains of Hox gene expression are determined is critical to elucidating the means by which the embryo is patterned along the anteroposterior axis. We have performed a detailed analysis of the mouse *Hoxb4* intron enhancer to identify upstream transcriptional regulators. In the context of an heterologous promoter, this enhancer can establish the appropriate anterior boundary of mesodermal expression but is unable to maintain it, showing that a specific interaction with its own promoter is important for maintenance. Enhancer function depends on a motif that contains overlapping binding sites for the transcription

factors NFY and YY1. Specific mutations that either abolish or reduce NFY binding show that it is crucial for enhancer activity. The NFY/YY1 motif is reiterated in the *Hoxb4* promoter and is known to be required for its activity. As these two factors are able to mediate opposing transcriptional effects by reorganizing the local chromatin environment, the relative levels of NFY and YY1 binding could represent a mechanism for balancing activation and repression of *Hoxb4* through the same site.

Key words: *Hoxb4*, Transcriptional regulation, NFY, YY1, Embryo, Transcription factor, Mouse

## INTRODUCTION

There are 39 members of the *Hox* gene family in the mouse, distributed across four clusters and assigned to 13 paralogy groups (Krumlauf, 1994). One of the striking features of the genes in this family is that they display spatially restricted expression along the anteroposterior (AP) axis of the developing embryo, characterized by very precise anterior boundaries. Moreover, the physical order of genes in a cluster corresponds both to the temporal order in which they are activated and to the anterior extents of their expression, a phenomenon known as colinearity.

That Hox genes function in the determination of regional identity along the AP axis in the mouse has been firmly established by extensive mutational analyses. Thirty four of the 39 genes have now been subjected to targeted disruption and, in general, loss of an individual Hox gene results in a phenotype in the region that corresponds to the most anterior region of its expression domain. Furthermore, an increasing number of compound mutants are being generated involving paralogous and/or non-paralogous genes (Horan et al., 1995; Manley and Capecchi, 1997). These often result in synergistic

phenotypes that uncover important functional roles for Hox genes that are not revealed by mutation of single genes. It is clear from these studies that an understanding of how boundaries and domains of Hox gene expression are determined is crucial to elucidating the means by which the embryo is patterned. Further underlining the importance of transcriptional regulation, exchange of coding sequences between the *Hoxa3* and *Hoxd3* loci demonstrates that the proteins encoded by these two paralogous genes are functionally equivalent (Greer et al., 2000). Therefore, the specificity observed for each gene must result from differences in their patterns and/or levels of expression.

Thus far, transgenic reporter genes have been the principal strategy employed to investigate the transcriptional control of Hox genes in mice. These studies have revealed that, in general, Hox gene transcription is controlled by a modular system of enhancers located within a few kilobases up- or downstream of the gene (Maconochie et al., 1996). Typically, each enhancer directs tissue- and spatially-specific subsets of the complete expression pattern and often displays the ability to function independently of other regulatory modules. This has greatly facilitated the fine-scale analysis of these regions,

which has led to the identification of a number of important regulators of Hox gene expression. To date, these are the retinoic acid and retinoid X receptors (Gould et al., 1998; Zhang et al., 2000); Cdx family proteins (Charite et al., 1998); Krox20 (Maconochie et al., 2001); kreisler (Manzanares et al., 1999); members of the AP-2 family of transcription factors (Maconochie et al., 1999); Sox/Oct heterodimers (Di Rocco et al., 2001); and Hox proteins themselves, in conjunction with the Pbx and Meis families of co-factors (Gould et al., 1997; Jacobs et al., 1999).

It is important to note, however, that proximal sequences have not always proved sufficient to recapitulate the endogenous expression pattern (Vogels et al., 1993; Charite et al., 1995). Indeed, for *Hoxb8* there is evidence that regulatory elements located nearly 30 kb downstream of the gene (between *Hoxb5* and *Hoxb4*) interact with local enhancers to determine the correct boundary of expression in the neural tube (Valarche et al., 1997). In addition, there are likely to be regulatory mechanisms that operate in a cluster-wide manner. Direct manipulations of the endogenous Hoxd cluster have identified enhancers that act globally, controlling expression of multiple genes in the limb and gut, and have shown that a directional insulator delineates the range of action of one such global element within the cluster (van der Hoeven et al., 1996; Kondo et al., 1998; Herault et al., 1999; Kmita et al., 2000a). Perhaps most dramatically, these experiments have revealed that release from global silencing of the cluster determines the proper timing of activation of the Hoxd genes, and is likely to be a key process controlling colinearity (Kondo and Duboule, 1999; Kmita et al., 2000b). Thus, it seems that the proper regulation of Hox gene expression may be accomplished by a number of diverse mechanisms.

We have previously defined the sequences required to recapitulate *Hoxb4* expression in transgenic mice (Whiting et al., 1991). A 3'-flanking enhancer (region A) directs expression in the neural tube up to the rhombomere 6/7 boundary, while an intronic enhancer (region C) mediates expression within the posterior neural tube, neural crest and mesodermal derivatives. In the absence of these regions, the *Hoxb4* promoter shows only ectopic activity in the dorsal midbrain. We have focused our attention on region C because it is required to set the correct anterior limit of *Hoxb4* expression in the paraxial mesoderm, at the level of somite 6/7. In this study, we have further characterized the regulatory capacity of region C on the *hsp68* promoter. We demonstrate that the anterior boundary of somitic expression is initially specified correctly but in contrast to the homologous promoter construct it fails to be maintained. Sequence comparison with the *Fugu rubripes Hoxb4* gene revealed the presence of a highly conserved region (CR1), which was subsequently shown to be necessary for enhancer activity (Aparicio et al., 1995). We identify a crucial binding site within CR1 that is similar to a motif located within the 5'-untranslated region of *Hoxb4* that we have previously shown to be essential for promoter function (Gutman et al., 1994). This element is able to bind both YY1 and an unknown factor that we named HoxTF (for Hox gene transcription factor). We now demonstrate that HoxTF is the heterotrimeric transcription factor NFY and show that the NFY/YY1 site is necessary for the mesodermal and neural activity of region C. We discuss our results in the light of evidence that NFY and YY1 play

opposing roles in the determination of transcriptional states by the recruitment of chromatin modifying co-factors.

## MATERIALS AND METHODS

### Reporter constructs and transgenic mice

The 1.4 kb *Sall*-*Bgl*III region C fragment of *Hoxb4* was cloned upstream of the *hsp68* promoter-*lacZ*-SV40 polyA reporter gene (Whiting et al., 1991) to generate CHZ. CHZΔ559-599 was made by cloning an oligonucleotide into the *MunI*/*Sfi*I sites of CHZ to produce a 41 bp deletion. CHZ-mN+Y, -mNFY1, -mNFY2 and -mYY1 were constructed by cloning two pairs of complementary, partially overlapping oligonucleotides (which span CR1 and carry specific mutations) into the *MunI*/*Sfi*I sites of CHZ. Construct b4C-511-558-mYY1 was made by cloning an oligonucleotide into the *Hind*III site of p610ZAI (Whiting et al., 1991). Full details of all cloning steps are available on request.

The production, PCR diagnosis and whole-mount staining of transgenic mice were performed as described previously (Whiting et al., 1991; Gilthorpe and Rigby, 1999). Vibratome sections (70 μm) were cut after embedding specimens in 2.0% (w/v) agarose (SeaKem® Gold, FMC Bioproducts) and postfixation at 0°C for 2-3 hours in freshly made PLP [2% (w/v) formaldehyde, 0.1 M L-lysine, 0.01M sodium m-periodate in PBS].

### DNA sequence alignments

CR1-equivalent regions were identified by pair-wise DNA sequence alignment with MacVector (IBI-Kodak). The mouse *Hoxb4* intron sequence was provided by R. Allemann and verified by double-stranded sequencing (dRhodamine terminator cycle sequencing kit, Perkin-Elmer). Chick *Hoxa4*, *Hoxb4* and *Hoxd4* sequences were communicated by A. Kuroiwa (Morrison et al., 1995). Upon sequencing of a chick *Hoxb4* CR1 PCR fragment, three additional G residues were found (equivalent to 563, 566 and 571 of region C) that improve the degree of identity with all *Hoxb4* paralogues in the alignment. The medaka *Hoxa4* sequence has been published previously (Haerry and Gehring, 1997). Other sequences were obtained from the GenBank database under the following Accession Numbers: *Amphioxus amphioxus* *Hox4*, AB028208; *Fugu Hoxb4*, FRU92575; horn shark (*Heterodontus francisci*) *Hoxa4*, AF224262; mouse *Hoxa4*, X66861; *Hoxd4*, MMU77364; zebrafish *Hoxa4a*, AF071246; *Hoxb4a*, AF071252; *Hoxc4a*, AF071264. The mouse *Hoxc4* sequence was identified from a working draft HTG sequence (AC021667) by comparison with the mouse cDNA clone NM\_013553 (Geda et al., 1992). Sequences were imported in to MegAlign (DNASTAR) and aligned manually to give a best fit to the mouse *Hoxb4* sequence. The resulting multiple alignment was shaded using MacBoxshade 2.1 (M. Baron, Institute for Animal Health, UK).

### Electrophoretic mobility shift assays (EMSA) and supershifts

Gel retardation experiments were performed as described (Gutman et al., 1994) except poly-(dI-dC) was used as a nonspecific competitor. Whole-cell protein extracts were prepared from 10.5 dpc mouse embryos or the mouse neuroblastoma cell-line Neuro2a, and nuclear extracts from mouse F9 embryonal carcinoma (EC) stem cells. Specific competitors were added at 100-fold molar excess. For supershift experiments, an anti-NFYA antibody (gift from C. Benoist, Strasbourg, France) was added to the reaction 1 hour before addition of the labelled probe.

### Size fractionation

Proteins from F9 EC nuclear extracts were separated on a 12.5% (w/v) SDS-PAGE gel. Gel slices were excised and incubated in buffer E (150 mM NaCl, 20 mM Hepes (pH 7.5), 5 mM DTT, 0.1 mM EDTA,

0.1 mg/ml BSA, 0.1% (w/v) SDS), for 3 hours at 37°C with agitation. Eluted proteins were recovered by acetone precipitation and resuspended in 20 µl of buffer R [20 mM Hepes (pH 7.5), 5 mM DTT, 0.1 mM EDTA, 0.1 mg/ml BSA] containing 6 M guanidine HCl for 20 minutes at 20°C and allowed to renature by dialysis against buffer R overnight at 4°C. Samples of 5 µl volume were used to test the binding activity in EMSAs.

### Protein purification

Nuclei were prepared from F9 EC cells grown in suspension (60 l) in DMEM supplemented with 10% (v/v) foetal calf serum. Pelleted cells were washed with PBS, resuspended in three volumes of hypotonic buffer [10 mM Tris-HCl (pH 7.4), 10 mM NaCl, 1 mM DTT, 1 mM EDTA, 1 mM PMSF] and incubated at 4°C for 15 minutes. Cells were broken in a Dounce homogenizer and nuclei recovered by centrifugation (2000 g for 30 minutes) followed by extraction (10 minutes, 4°C) with buffer D [20 mM Hepes (pH 7.6), 20% (v/v) glycerol, 5 mM MgCl<sub>2</sub>, 0.2 mM EDTA, 1 mM DTT, 0.3 M NaCl] containing protease inhibitors (1 mM PMSF, 1 mM benzamidine, 2 mM levanizole, 10 mM β-glycerophosphate, 1 µg/ml leupeptin, aprotinin and pepstatin). For purification, nuclear extracts were loaded (10 ml/hour) onto a wheat-germ agglutinin (WGA) agarose column (Vector Lab, Bretton, UK) pre-equilibrated with buffer D. After an extensive wash, proteins were eluted with buffer Z' [20 mM Hepes (pH 7.6), 12.5 mM MgCl<sub>2</sub>, 10 µM ZnSO<sub>4</sub>, 20% (v/v) glycerol, 0.1% NP40, 1 mM DTT] containing 0.1 M NaCl, 0.3 M N-acetylglucosamine and protease inhibitors.

DNA-affinity purification was performed as described by Kadonaga and Tjian (Kadonaga and Tjian, 1986). The oligonucleotides used to prepare the affinity columns contained either the wild-type NFY-binding site from *MyoD1* [5'-GATCTCTCTGAGCCATTCCCAGATGGAGAAAT-3' (plus strand); 5'-GATCATCTCCATCTGGGAATG-GCTCAGAGA-3' (minus strand)] or a mutant form containing the CCA to AAC mutation (underlined above). After annealing and concatemerization, oligonucleotides were coupled to CNBr Sepharose (Pharmacia, St Albans, UK). WGA column eluate was incubated with 5 µg/ml of salmon sperm DNA for 1 hour at 4°C and applied to the two linked columns, such that it passed first through the column bearing the mutated binding site and subsequently through the column bearing the WT oligonucleotide. The two columns were separated, washed with 20 column volumes of buffer Z' containing 0.1 M NaCl and eluted with three column volumes of buffer Z' containing 1 M NaCl. The eluate from the WT column was reappplied to the regenerated WT column, which was washed and eluted as above. A small fraction of each eluate was analysed by SDS-PAGE.

### Peptide sequencing

Coomassie stained bands (48, 45 and 36 kDa) were excised, destained and digested in-gel with trypsin overnight at 37°C. Peptides were extracted twice with 50% (v/v) acetonitrile/1% (v/v) TFA and then concentrated prior to analysis. Peptides were resolved using tandem ion exchange and c18 reverse phase separation on a Michrom HPLC system. Edman sequencing on the collected peptides was carried out using an Applied Biosystems Procise system employing fast cycle chemistry.

## RESULTS

### The activity of region C is promoter dependent

Fig. 1A shows a time-course of the expression of the region C-*hsp68-lacZ* reporter construct (CHZ). At 8.5 dpc (Fig. 1A, part a) strong neural tube staining was visible up to an axial level adjacent to Somite (So) 4 with a gradation of weak staining extending rostrally for a further 1-2 segmental units. This is in agreement with the extent of neural expression set by region C

on the *Hoxb4* promoter at the spinal cord/hindbrain boundary (Whiting et al., 1991). Notably, staining within the somitic and flank mesoderm corresponded to the anterior boundary of *Hoxb4* expression at the level of So 6/7. However, this boundary was not maintained and by 9.5 dpc had regressed to So 13/14 (Fig. 1A, part b). This corresponds to the transition between cervical and thoracic regions, raising the possibility that different regulatory mechanisms might operate in these domains. An equivalent shift was also seen within the flank mesoderm and in the neural tube but there was no further change in this pattern until at least 12.5 dpc (data not shown). In the central nervous system (CNS) of a 12 dpc embryo, expression was localized to the dorsal neural tube, floor plate and ventral roots of the spinal nerves, up to the first cervical nerve (Fig. 1A, parts c-e). Strong staining was evident in the dorsal root ganglia (drg) and sympathetic ganglia (sg), both neural crest derivatives.

These results demonstrate that region C, in conjunction with the *hsp68* promoter, can establish the appropriate anterior boundary of *Hoxb4* expression at So 6/7 but is unable to maintain it beyond 8.5 dpc. This is in contrast to constructs containing the *Hoxb4* promoter (compare Fig. 1A, parts c and f), indicating that specific enhancer-promoter interactions are important in determining the boundary of somitic expression. In addition, CHZ does not display the normal graded distribution of *Hoxb4* expression that is seen with larger *Hoxb4* promoter constructs (Whiting et al., 1991). Strong posterior expression is evident with CHZ from the earliest stages examined.

### Important regulatory elements are located in the 5'-half of CR1

We have previously shown that region C contains a short stretch of intronic sequence highly conserved between mouse and *Fugu Hoxb4* and named it CR1 (Conserved Region 1) (Aparicio et al., 1995). CR1 is crucial for region C activity in transgenic mice carrying CHZ (Fig. 1A, parts j-l) or a similar chicken *Hoxb4* transgene (Morrison et al., 1995). We generated multiple sequence alignments of all available paralogous group 4 (PG4) Hox gene introns from different species (Morrison et al., 1995; Haerry and Gehring, 1997; Kim et al., 2000). A CR1-like region was identifiable within the intron and close to the 5'-splice site in all of the sequences examined (Fig. 1B). The greatest degree of overall sequence identity to mouse was seen between the *Hoxb4* sequences (average=68%). *Hoxa4* and *Hoxc4* sequences showed an intermediate identity and *Hoxd4/AmphiHox4* sequences the least. All sequences shared greatest identity over a 28 bp region corresponding to bp 573-600 of region C, previously defined as the HB-1 element. This contains several consensus homeodomain-binding sites and is able to respond to Hox family proteins in *Drosophila* (Haerry and Gehring, 1997; Keegan et al., 1997). Several other conserved motifs (I-IV) are also evident from this alignment.

To investigate which of the CR1 sequences are required for regulation we deleted the most conserved region including the HB1 element and motif IV from CHZ (CHZA559-599; Fig. 1C). In transient F<sub>0</sub> embryos between 11.5 and 12.5 dpc staining in the flank mesoderm was absent and the anterior boundary in the neural tube was less distinct and appeared to be shifted caudally by 1 or 2 segments (Fig. 1A, parts h and i). However, somitic staining was equivalent to that of CHZ. As

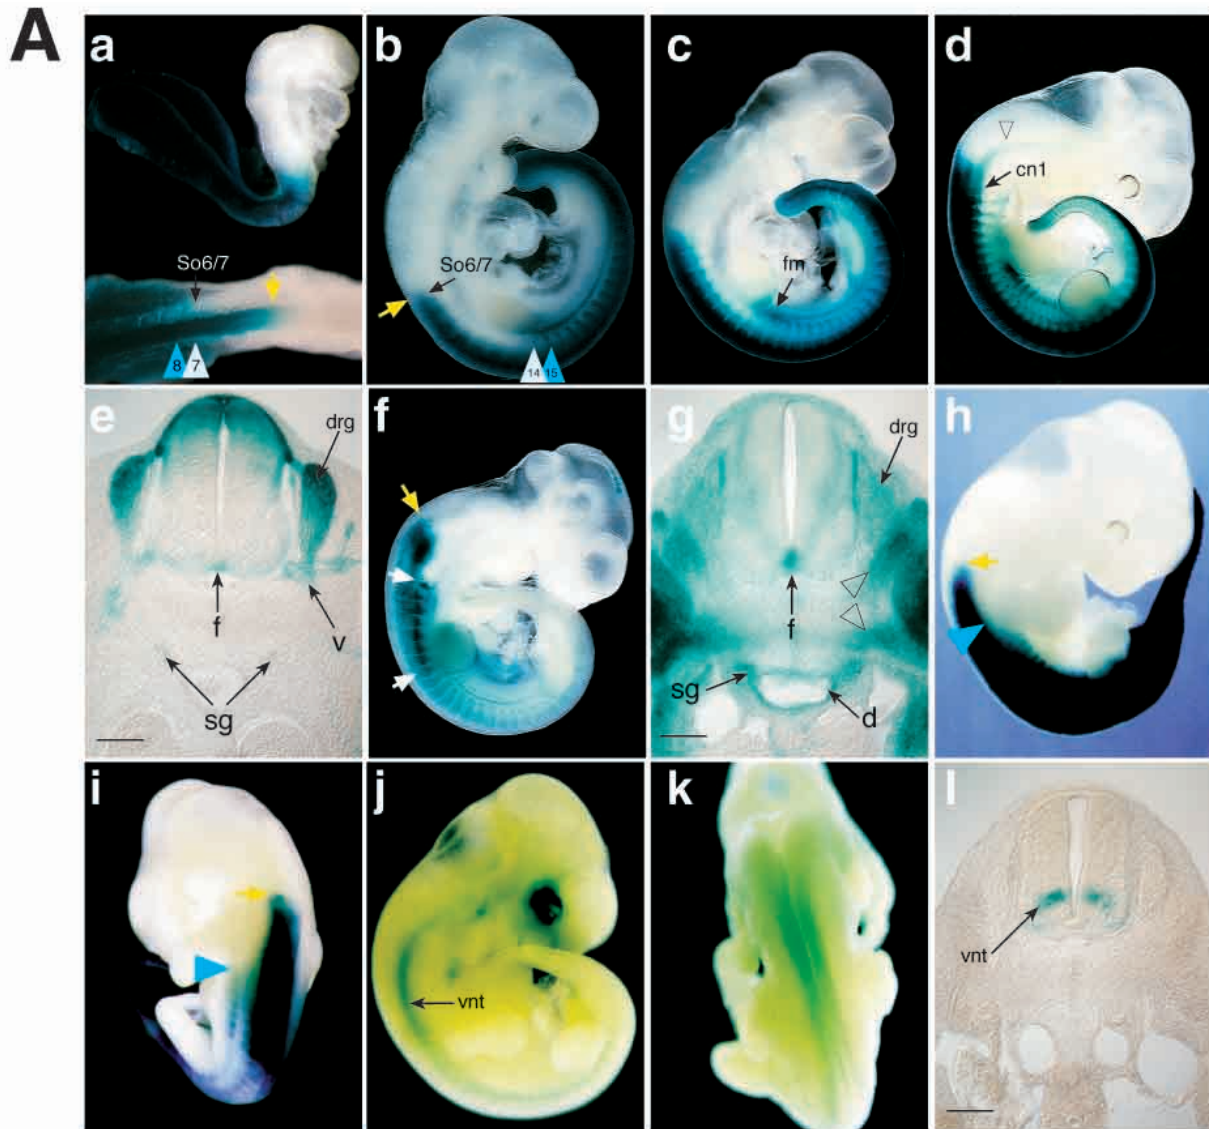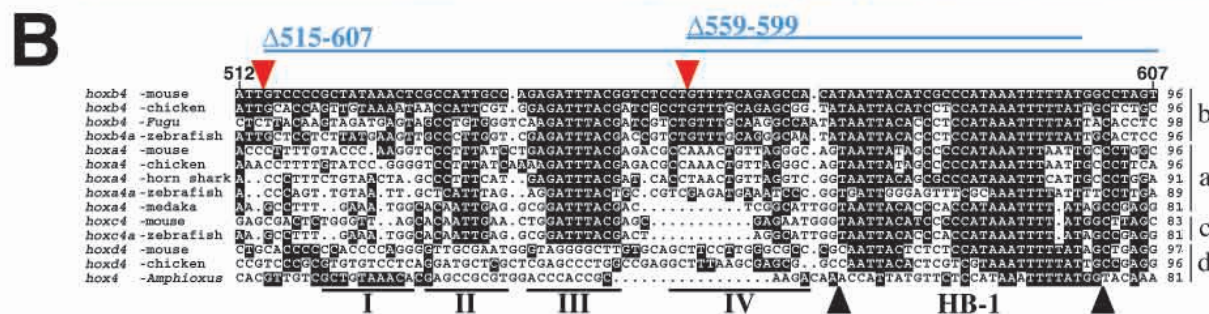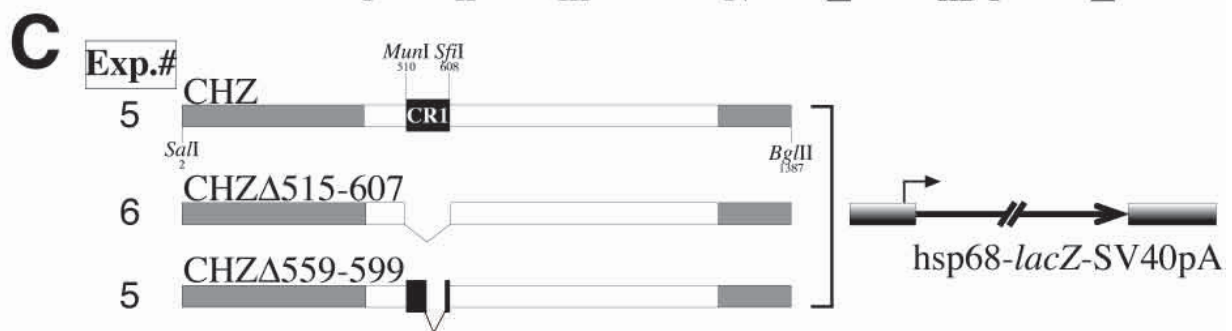

**Fig. 1.** (A) Expression patterns of region C constructs. (a-e) CHZ. (f,g) *Hoxb4* promoter-region C construct. (h-l) CR1 deletions. (A) Lateral and dorsal views of a 10 somite (So) stage embryo, showing anterior boundaries of expression: neural tube adjacent to So 4 (yellow arrow); somitic and flank mesoderm at So 6/7 (black arrow). Typical of Hox gene expression domains, staining is weaker in So 7 (light blue triangle) than in So 8 (dark blue). (b) 9.5 dpc: somitic boundary regresses to So 13/14 (triangles); neural boundary regresses to So 6/7 (yellow arrow). (c) 10.5dpc: staining in flank mesoderm (fm). (d) 12 dpc: strong staining in spinal ganglia up to the first cervical nerve (cn1) and ventral neural tube, extending anteriorly (open triangle). (e) Transverse section (TS), forelimb level of a similar embryo (drg, dorsal root ganglia; sg, sympathetic ganglia; f, floorplate; v, ventral root of spinal nerve). (f) 11 dpc embryo (*Hoxb4* promoter, construct 5) (Whiting et al., 1991): note strong anterior domains of expression in the neural tube up to the spinal cord/hindbrain boundary (yellow arrow) and in the somitic mesoderm between the anterior So 6/7 boundary and So14 (white arrows). (g) TS forelimb level of the same embryo: note strong staining in sclerotomal derivatives (open triangles) and the dorsal aorta (d). (h,i) Lateral and dorsal views of a 12 dpc embryo (CHZΔ559-599): boundaries of expression in the neural tube (yellow arrow) and in the somitic mesoderm (blue triangle) are indicated. (j,k) Lateral and dorsal views of a 12dpc embryo (CHZΔ515-607): consistent expression is restricted to a domain in the ventral neural tube (vnt). (l) TS thoracic level of the same embryo. Scale bars: 100μm. (B) Sequence alignment showing a comparison between CR1 of the mouse *Hoxb4* intron and those of other paralogous group 4 Hox genes, identical bases are highlighted in black. Numbering is with respect to that of region C (bp 1 is the first base of the *SalI* site in exon 1, +321 of *Hoxb4*). The number of base pairs (bp) in each aligned sequence is shown on the right. The extents of the two deletions in constructs CHZΔ559-599 and CHZΔ515-607 are marked with blue lines and the boundaries of a possible *cis*-positive regulatory element (bp 515-558), identified by these deletions, are marked by red triangles. The margins of the 28bp HB-1 element (bp 574-601) are shown (black triangles). The locations of four conserved motifs are marked below (I-IV). (C) Schematic diagram of the transgenes in A. The *hsp68* promoter-*lacZ* reporter, which is common to each construct, is not shown to scale. Exons are shaded grey. CR1 is represented by a black rectangle within the intron (white rectangle) flanked by *MunI* and *SfiI* restriction sites. CHZΔ515-607 carries a deletion of the entire CR1 region (Aparicio et al., 1995). An example is shown for comparison. Exp. # denotes the total number of independent transgenic F<sub>0</sub> embryos and lines generated with each construct giving a consistent pattern of expression.

CHZΔ559-599 did not exhibit the dramatic loss of activity that we have previously observed with a larger deletion of CR1 (CHZΔ515-607; Fig. 1A, parts j-l), we focused on the presence of positive regulatory sequences located between bp 515-558.

### HoxTF and YY1 bind to overlapping sites in CR1

To search for transcription factor-binding sites in CR1 we conducted DNA-electrophoretic mobility shift assays (EMSAs) with a series of oligonucleotide probes. Under various reaction conditions we did not detect any specific binding with probes that represented the 3' sequences of CR1, including the HB1 element (bp 563-617; data not shown). However two discrete complexes were detected with a probe representing bp 509-568 (Fig. 2A,B, lanes 1-4). We further localized the sequences required for binding to bp 525-551 (b4Cwt; Fig. 2A,B, lanes 5-7) and mutated this region (b4Cm1-4, Fig. 2A). Probes m3 and m4 behaved similarly to b4Cwt

detecting the two specific shifts, while m1 and m2 did not (Fig. 2B, compare lanes 5 and 8-11). This shows that the sequence TCGCCATT (mutated in m1/m2) is required for binding.

This motif is similar to the HoxTF/YY1 site (TGGCCATT) that we have characterized in the *Hoxb4* promoter (Gutman et al., 1994). Specific mutational analysis demonstrated that HoxTF is essential for the transcriptional activity of a minimal *Hoxb4* promoter construct in transfected cells. In EMSAs, the promoter site (HoxPwt) efficiently competed for the two complexes formed by b4Cwt (Fig. 2C, lane 2). Furthermore, HoxTF sites from the *myogenin* and *MyoD1* genes were also able to compete effectively for HoxTF but not YY1 binding (Fig. 2C, lanes 4 and 5) (Gutman et al., 1994). By contrast, a mutated *MyoD1* site failed to compete (Fig. 2C, lane 6). These results show that the CR1 motif is comparable with the site in the *Hoxb4* promoter and is able to bind both HoxTF and YY1 in a non-cooperative manner.

Differences in the relative affinities of HoxTF and YY1 for the different sites are evident from these experiments and were investigated further by direct binding assays. Each of the *Hoxb4* probes produced YY1 shifts of comparable intensities, indicating that it binds with a similar affinity. However, the HoxTF shift with b4Cwt was five- to 10-fold weaker than that observed for HoxPwt (Fig. 2D, lanes 1-2). YY1 had the lowest affinity for the *MyoD1* site (Fig. 2D, lane 5), which competed only weakly for YY1 binding to b4Cwt (Fig. 2C, lane 5). However, this site had the highest affinity for HoxTF and for this reason we subsequently used it to detect HoxTF.

To define the polypeptide factor(s) that constitutes HoxTF, we performed EMSAs with renatured proteins that had been size fractionated by SDS-PAGE. A shift corresponding to HoxTF was evident when the 31-51 kDa fraction was used (Fig. 3A). This shift was abolished by competition with an excess of unlabelled probe, but not of a mutated probe, indicating that binding was sequence specific (Fig. 3A, lanes 2 and 10-12). A retarded band was also observed with the 98-116 kDa fraction (lane 6) but was nonspecific as it was competed for by both wild-type and mutated probes (data not shown). The 59-66 kDa fraction produced a shift corresponding to YY1 (molecular mass=65 kDa) (Shi et al., 1997).

### NFY is the HoxTF binding activity

HoxTF was purified from F9 EC extracts using wheat germ agglutinin and sequence-specific DNA affinity chromatography (Fig. 3B). Three major bands (36, 45 and 48 kDa) were observed when purified proteins were analysed by SDS-PAGE. Peptide sequencing of the 45 and 48 kDa species identified them as the A-subunit of NFY, a transcription factor composed of three subunits (NFYA to NFYC), all of which are necessary for DNA binding (McNabb et al., 1995; Sinha et al., 1995). NFYA, NFYB and NFYC are described as 42, 36 and 40 kDa proteins, respectively (Sinha et al., 1995), consistent with the molecular masses of the proteins we have purified. The 36 kDa band was shown to be NFYB by western blotting with a subunit specific antibody (data not shown). NFYC was not identified but it is possible that it co-migrated with the 45 kDa band because NFYA and NFYC are of a similar molecular weight. In the absence of an NFYC-specific antibody we could not investigate this point further.

We confirmed the binding of NFY to the b4Cwt site by

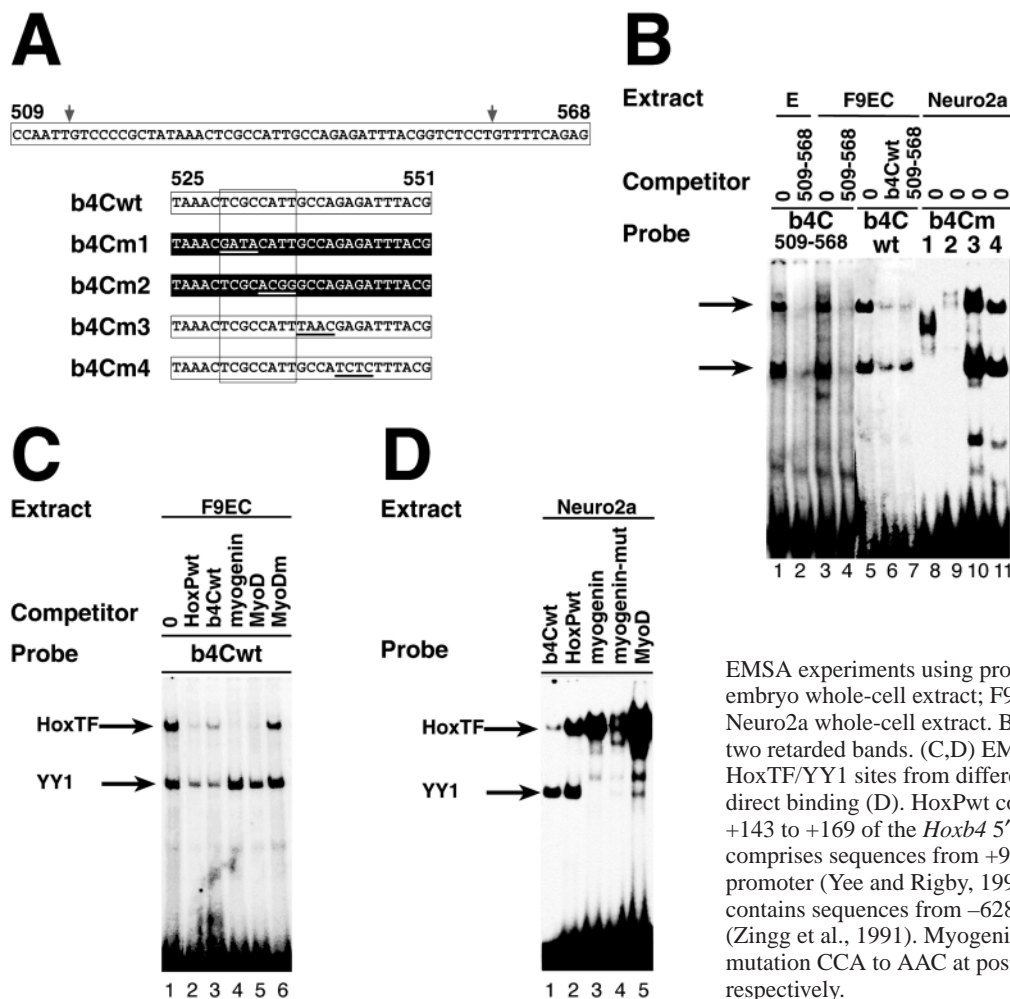

**Fig. 2.** The localization of binding sites within CR1. (A) Sequences of probes used in EMSA experiments to localize the binding of factors within CR1. The region of interest described in Fig. 1B,C is marked by black arrows. Mutations; m1, m2, m3 and m4 are underlined and the sequences important for binding are boxed. (B) Results of

EMSA experiments using probes depicted in A: E, 10.5dpc mouse embryo whole-cell extract; F9 EC, F9 EC nuclear extract; Neuro2a, Neuro2a whole-cell extract. Black arrows indicate the position of the two retarded bands. (C,D) EMSA experiments comparing HoxTF/YY1 sites from different genes, by competition (C) and direct binding (D). HoxPwt contains wild-type (wt) sequences from +143 to +169 of the *Hoxb4* 5'-untranslated region and myogenin comprises sequences from +9 to +35 of the mouse myogenin promoter (Yee and Rigby, 1993; Gutman et al., 1994). MyoD contains sequences from -628 to -602 of the mouse *MyoD1* gene (Zingg et al., 1991). Myogenin-mut and MyoDm contain the mutation CCA to AAC at positions +17 to +19 and -620 to -618, respectively.

EMSA competition and super-shift experiments (Fig. 3C). A known NFY binding site from the MHC class II E $\alpha$  gene (Dorn et al., 1987) competed efficiently for the binding of HoxTF to b4Cwt without affecting the binding of YY1. A site bearing a mutation that impairs the binding of NFY failed to compete (Fig. 3C, lanes 2 and 3). A consensus binding site for the CCAAT/enhancer binding protein (C/EBP), which is also able to bind to CCAAT box containing sequences, though unrelated to NFY (Mahoney et al., 1992), also failed to compete (Fig. 3C, lane 4). Finally, the retarded band observed with b4Cwt was completely super-shifted with an anti-NFYA antibody (Fig. 3C, lane 6), verifying that NFY is the HoxTF binding activity. We also noted the presence of an additional site located within the 3'-half of the intron (GCCATTGGG; 944-952 of region C). NFY and YY1 were also able to bind to this site, although the affinity of NFY for it is three- to fivefold less than for b4Cwt (data not shown; Fig. 6A).

### The NFY-binding site is essential for enhancer activity in vivo

Based on our previous analysis of the *Hoxb4* promoter site (Gutman et al., 1994) we engineered specific mutations able to impair the binding of NFY and YY1. Because the NFY-specific mutation had 15-20% residual binding activity (b4CmNFY1, data not shown), we designed a second mutation (b4CmNFY2)

that completely abolished NFY binding. We tested the capacity of oligonucleotides carrying the various mutations to compete for the binding of NFY and YY1 to b4Cwt (Fig. 4A). The double mutant (b4CmN+Y, same as b4Cm2, Fig. 2A) failed to compete for the binding of either NFY or YY1 (Fig. 4A, lane 5). The b4CmYY1 mutant competed for NFY binding but not for that of YY1 (Fig. 4A, lane 3), while the b4CmNFY2 mutant competed for the binding of YY1 but not for that of NFY (Fig. 4A, lane 4).

We introduced each mutation into CHZ and analysed the patterns of expression in transgenic embryos (Fig. 4B). The double NFY/YY1 mutation (b4C-mN+Y) had a drastic effect on the expression of the transgene. At 12.5 dpc, all of the mesodermal components of CHZ expression were consistently absent and expression within neural tissues was greatly reduced (Fig. 4B, parts a and b). However, the b4C-mN+Y mutant construct exhibits residual expression within the nervous system that may indicate a positive contribution by other elements within CR1, or that the b4C-mN+Y mutation retains some level of binding indiscernible by our EMSAs. Interestingly, of the 3 F<sub>0</sub> embryos obtained at 9.5-10.5 dpc, all displayed much stronger relative levels of expression than at later stages, including staining in the paraxial and flank mesoderm that was spatially equivalent to the wild-type construct, though weaker (Fig. 4B, parts c and d). This suggests that there is both an early requirement for

the NFY/YY1 site to achieve the proper level of enhancer-mediated activation, and a later requirement to maintain expression within the mesoderm and nervous system.

Specific mutation of the NFY site (b4C-mNFY2) resulted in a staining pattern that was similar to that of the double mutation (Fig. 4B, parts g and h). Staining was detected at a low level in the neural tube, ventral roots, dorsal root ganglia and sympathetic ganglia. However, there was an absence of mesodermal activity and a reduction in the level of neural staining compared to mN+Y and this was mosaic in all 10 embryos. Interestingly, the b4C-mNFY1 construct produced a pattern of activity that was intermediate between those of CHZ and mNFY2 (Fig. 4B, parts j-l). Staining was present in the same tissues but was not mosaic.

The YY1 mutant construct (b4C-mYY1) displayed a reduced level of staining in the somites, relative to the neural tube, and a caudal shift in the anterior boundary of strong expression, to the level of the hind limb (Fig. 4B, parts e and f). Interestingly, staining within the flank mesoderm appeared normal. In several embryos (4/7), neuroectodermal staining extended to regions more anterior than the normal extent of region C activity. While this shows that the b4C-mYY1 mutation deregulates the activity of region C, this single bp change also causes a slight reduction in NFY affinity (Fig. 4A, lane 3). Hence the observed changes in expression may result from either the loss of YY1 binding or a subtle effect on the level of NFY binding.

These results demonstrate that the NFY/YY1 site in CR1 is important for region C enhancer activity in both mesodermal and neural domains and that positive regulation is largely mediated through the binding of NFY. Owing to the overlapping nature of the NFY/YY1 motif and the difficulty of identifying YY1-specific mutations that do not also interfere with NFY binding, we are unable to definitively assign any function to the YY1 interaction.

### A single NFY site is not sufficient to confer spatially specific expression on a heterologous promoter

To address whether NFY is sufficient to direct tissue-specific expression we tested two versions of the NFY binding site (incorporating the YY1 mutation) on the *hsp68* promoter. The staining patterns obtained with a construct containing a single copy of the b4CmYY1 sequence (bp 525-551) were essentially random (seven cases) and indicative of nonspecific integration-site effects on the transgene. With a longer version of the NFY site (bp 511-558 of region C), which also included conserved elements I and III of CR1 (Fig. 1B), weak but

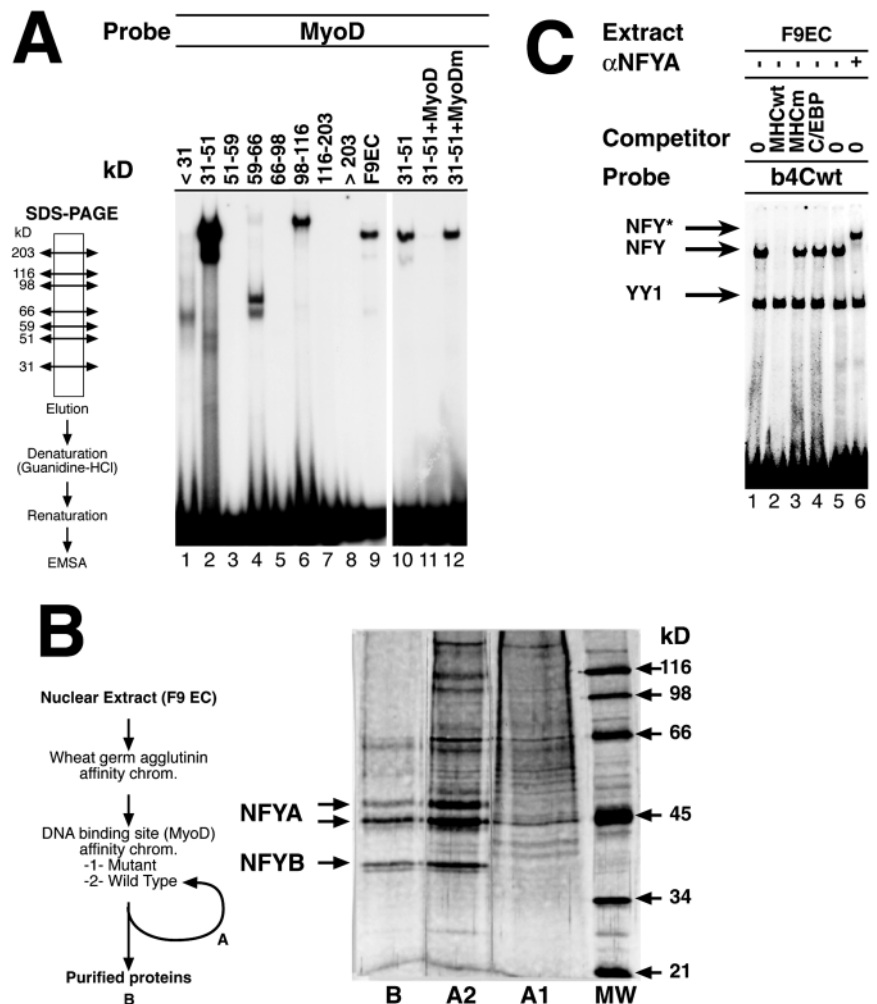

**Fig. 3.** Identification of HoxTF as NFY. (A) Protein fractionation experiments determine the approximate apparent molecular weight of HoxTF. A schematic of the method used is shown in the left. The binding potential of renatured F9 EC nuclear extract polypeptide fractions was analysed by EMSA using the MyoD probe. Molecular mass ranges of the fractions used are indicated at the top. (B) A schematic of the HoxTF purification scheme and a silver-stained SDS-PAGE gel of the purified proteins is shown on the left. Lanes A1 and A2 contain proteins eluted from the first DNA-affinity column bearing the MyoDm or the MyoD oligonucleotides, respectively. Lane B contains proteins eluted after passage of the A2 eluate over the MyoD affinity column. The purified proteins with molecular masses of 48, 45, and 36 kDa are indicated by arrows. (C) Confirmation of NFY binding to b4Cwt by EMSA. NFY\* indicates the complex supershifted by the addition of anti-NFYA antibody (lane 6).

consistent expression was detected in a subset of the spinal and cranial ganglia and the neural tube at 11.5 dpc (construct b4C-511-558-mYY1. Fig. 5A-C). These results show that while a single NFY-binding site is unable to recapitulate any aspect of region C activity, the inclusion of flanking sequences can lead to reproducible expression. This suggests that NFY may cooperate with factors that bind in close proximity to it.

## DISCUSSION

### The role of NFY in *Hoxb4* regulation

In this study, we demonstrate that our combined approach of transgenesis and biochemistry is capable of identifying hitherto

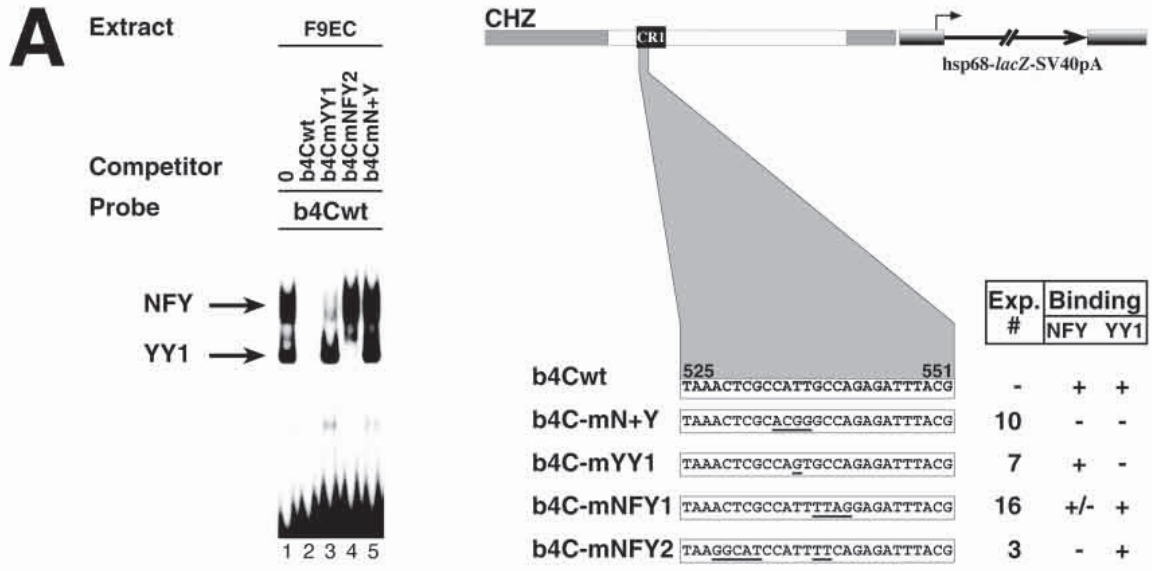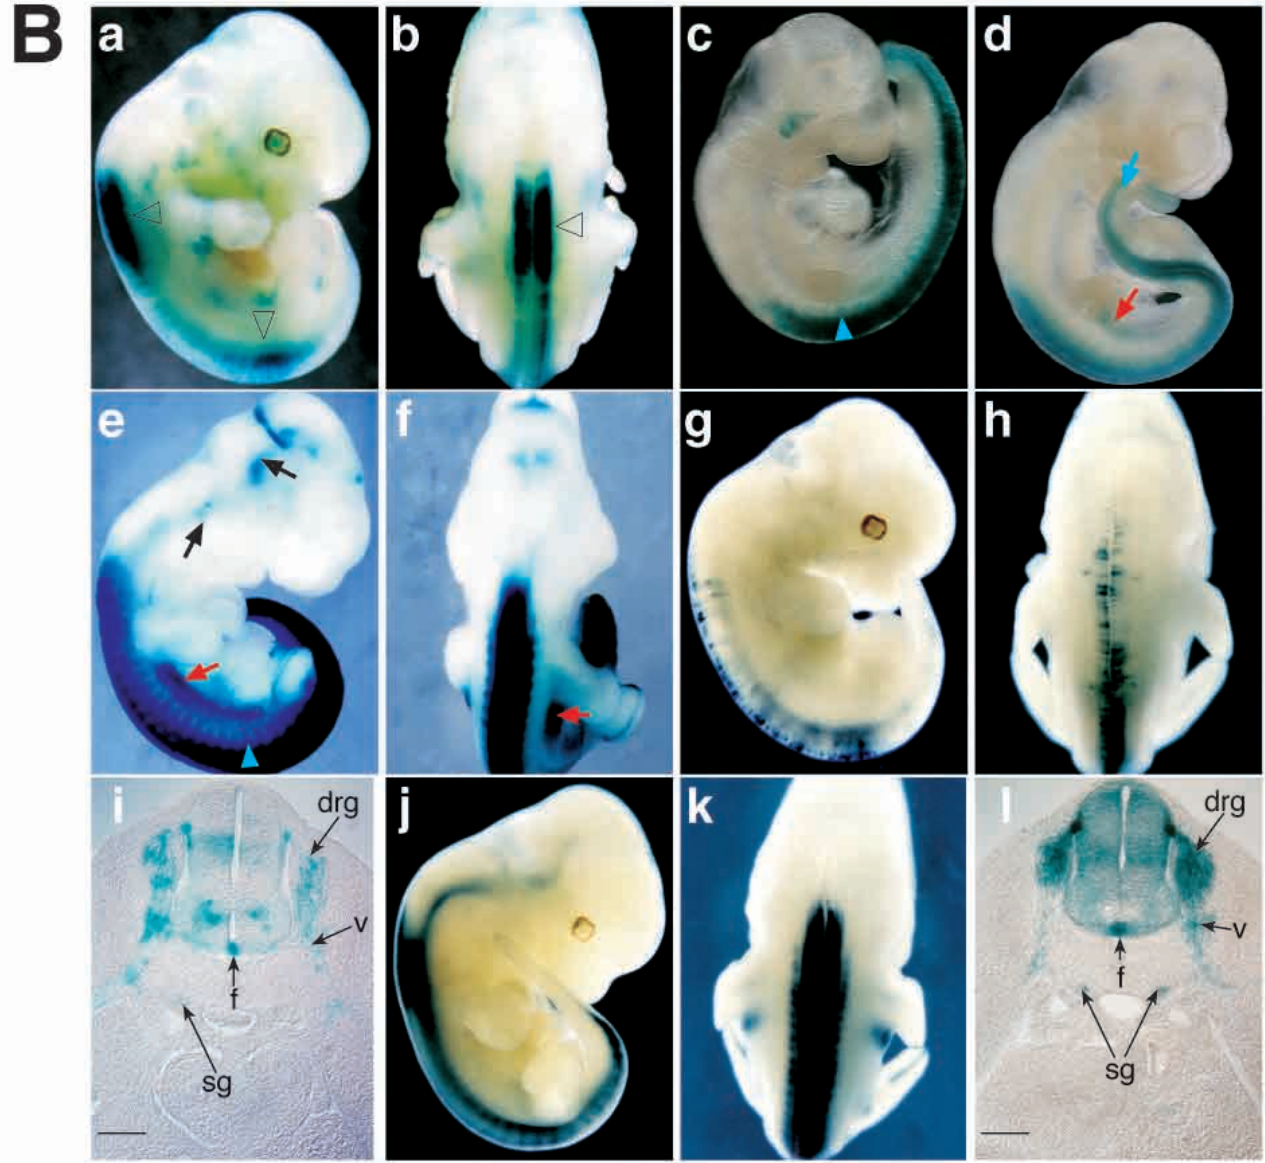



**Fig. 4.** In vivo requirement for the NFY site in CR1. (A) EMSA competition experiments showing the ability of specific mutations to interfere with the binding of YY1 and NF-Y to b4Cwt. On the right is a schematic of the various mutations and reporter constructs. Mutated nucleotides are underlined. The binding characteristics of the probes are summarized on the right (b4Cwt, wild type; b4C-mN+Y, double mutation; b4C-mYY1, YY1 specific mutation; b4C-mNFY1 and b4C-mNFY2, NFY specific mutations; +, binding; +/-, partial binding; -, no binding). (B) Transgenic mouse embryos stained for  $\beta$ -galactosidase activity showing the expression patterns derived from the mutant NF-Y/YY1 constructs. (a) Lateral and (b) dorsal views of a 12.5dpc embryo carrying construct CHZ-mN+Y. Residual staining was consistently observed in nervous system (open triangles). (c,d) Two different 9.5-10dpc embryos carrying the same construct. Weak somitic expression is visible at the level of So 13/14 (blue triangle in c) or in the most caudal somites (blue arrow in d), as is weak expression in the flank mesoderm (red arrow in d). (e) Lateral and (f) dorsal views of an 11.5dpc embryo carrying construct CHZ-mYY1. Black arrows indicate ectopic neural expression and blue arrowhead the anterior limit of somitic expression. Flank mesoderm staining is unaffected (red arrow). (g) Lateral and (h) dorsal view of a 12.5 dpc embryo carrying construct CHZ-mNFY2. (i) TS at the forelimb level of a similar embryo. (j) Lateral and (k) dorsal views of similar 12.5 dpc embryos carrying construct CHZ-mNFY1. (l) TS at the forelimb level of a similar embryo. drg, dorsal root ganglion; v, ventral root; f, floorplate; sg, sympathetic ganglia. Scale bars: 100  $\mu$ m.

unsuspected regulators of Hox gene transcription. Previous investigations of this nature have largely relied on identifying binding sites for known factors that are likely to be regulators and subsequently confirming their importance in transgenic reporter assays. An alternative strategy using yeast one-hybrid screens of known regulatory regions has not been widely employed in the study of Hox genes. However, this technique has led to the identification of a novel protein BEN (binding factor for early enhancer) as a putative regulator of *Hoxc8* (Bayarsaihan and Ruddle, 2000). We have determined a major in vivo requirement for NFY, a ubiquitously distributed transcription factor, in the spatially specific expression of *Hoxb4*. Specific mutations that either abolished or reduced NFY binding to the intron site in CR1 show that it is crucial for the mesodermal activity of region C. To date, we have identified three similar sites that are able to bind NFY/YY1 and are located, in the same orientation relative to transcription, in known regulatory regions of *Hoxb4* (one in the promoter and two in the intron). Furthermore, we have now shown that the NFY/YY1-binding motifs in the promoter and

CR1 of the intron are required for the transcriptional activity of *Hoxb4* (this study) (Gutman et al., 1994). We also demonstrate that region C, in conjunction with the *hsp68* promoter, cannot maintain an appropriate anterior boundary of somitic expression. As this is in contrast to constructs containing the *Hoxb4* promoter (Whiting et al., 1991), specific enhancer-promoter interactions are implicated in maintaining the boundary of *Hoxb4* expression after 8.5 dpc. It is an intriguing possibility that the NFY/YY1-binding sites might play a key role in mediating such interactions.

A wide variety of eukaryotic genes have been shown to contain NFY-binding CCAAT boxes in their promoters, although Hox genes have previously been cited as a large gene family that do not (Mantovani, 1999). Interestingly, the *Hoxb4* NFY sites are atypical for several reasons. Known NFY-binding CCAAT boxes are almost exclusively located upstream of the transcriptional start site in proximal promoter regions. The three *Hoxb4* sites are all positioned downstream of the two major transcriptional start sites of the gene and the intron sites are distally located. Furthermore, the presence of an overlapping YY1 site is novel.

NFY could regulate transcription of *Hoxb4* in various ways. It is known to stabilize the binding of other proteins to regulatory elements close to the CCAAT box and to interact directly with other transcription factors (Mantovani, 1999). These properties of NFY could be important for the recruitment of additional proteins to region C and/or the *Hoxb4* promoter in order to establish complexes that are capable of activating transcription. It can also interact with proteins of the general transcriptional machinery (Frontini et al., 2002), which could be important for initiation of transcription at the *Hoxb4* promoter or for facilitating enhancer/promoter interactions. In addition, NFY activates transcription by modifying local chromatin architecture via two distinct mechanisms. First, NFY binding has been shown to reposition nucleosomes, thus presetting the promoter for activation of transcription (Li et al., 1998). Secondly, it is able to indirectly alter the chromatin environment by recruiting transcriptional coactivators that possess histone acetyl transferase (HAT) activity (Currie, 1998; Jin and Scotto, 1998). Either or both of these properties could be essential to the role of NFY in regulating *Hoxb4* expression via the promoter or region C.

### The role of YY1 in *Hoxb4* regulation

Mutation of the YY1-binding site in CR1 results in both a reduction in the level of somitic expression, and a posteriorization of the anterior somitic boundary. However,

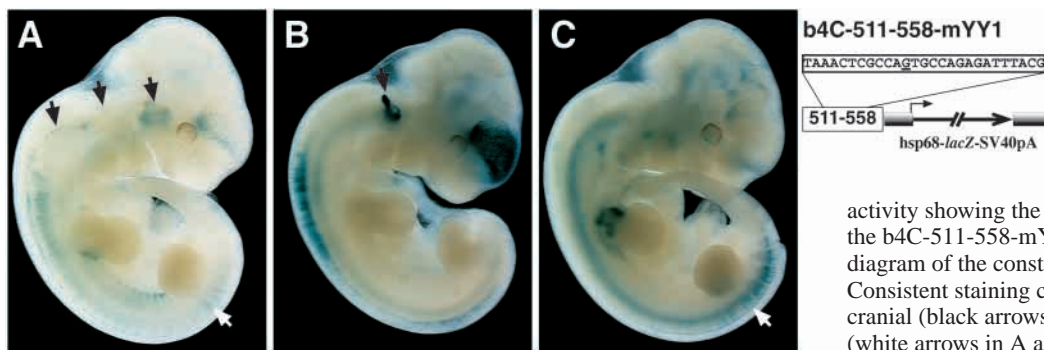

**Fig. 5.** Activity of a single isolated NFY/YY1 binding element. (A-C) Lateral views of three transient F<sub>0</sub> transgenic 12 dpc embryos stained for  $\beta$ -galactosidase

activity showing the expression patterns derived with the b4C-511-558-mYY1 construct. A schematic diagram of the construct is shown on the right. Consistent staining can be seen within the neural tube, cranial (black arrows in A and B) and spinal ganglia (white arrows in A and C).

interpretation of these effects is complicated by the slight reduction in NFY binding that accompanies the b4C-mYY1 mutation. It remains possible that this, rather than the loss of YY1 binding, is responsible for the observed changes in expression. However, the potential role of YY1 in *Hoxb4* regulation is intriguing. YY1 is a multifunctional protein that can act as an activator, repressor or initiator of transcription (Shi et al., 1997), but it is of particular interest to us that the DNA-binding domain of YY1 is structurally similar to that of the protein encoded by the *Drosophila* gene *pleiohomeotic* (*pho*) (Brown et al., 1998). *pho* is a member of the *Polycomb*-Group (*PcG*) of genes that are required to maintain the transcriptionally inactive state of Hox genes in appropriate regions of the embryo (Pirrotta, 1998). It has recently been shown that YY1 interacts with EED, a vertebrate homologue of the fly *PcG* protein Extra Sex Combs (ESC) (Satijn et al., 2001), which itself associates with another *PcG* protein EZH2, related to *Drosophila* Enhancer of Zeste (E(Z)) (van Lohuizen et al., 1998), and with histone deacetylases (HDACs) (van der Vlag and Otte, 1999). The *Drosophila* ESC and E(Z) proteins are also components of a complex that contains an HDAC (Tie et al., 2001), suggesting that YY1 may be part of an important complex involved in transcriptional repression. Such a complex may act during the early stages of embryogenesis as mice homozygous for a null allele of *YY1* die at implantation (Donohoe et al., 1999) and embryos lacking functional *Eed* or *Ezh2* do not survive beyond gastrulation (Faust et al., 1995; O'Carroll et al., 2001). Furthermore, mutation of another mouse *PcG* gene *M33* results in early activation of *Hoxd11* (Bel-Vialar et al., 2000). A similar effect is seen for *Hoxd4* and *Hoxd10* expression when the global repression of the Hoxd cluster is disrupted by targeted genomic deletions (Kondo and Duboule, 1999). In both of these cases expression at later stages appears normal. It is possible that YY1 recruits a repressive complex including *PcG* proteins and HDACs to the *Hoxb4* locus to prevent early expression of this gene.

**Fig. 6.** Comparison of NFY/YY1 sites. (A) An alignment of NFY/YY1 binding sites from the *Hoxb4* intron and promoter. The sequence of the forward strand is shown above aligned with the consensus for YY1 (Hyde-DeRuyscher et al., 1995). The sequence of the reverse strand is shown below aligned with the consensus for NFY (Mantovani, 1998). In each case, the core nucleotides of the site are shown in bold. Nucleotides that are unfavourable for binding based upon either consensus are represented in lower case. Variant nucleotides within the core sequences that are thought to abolish YY1 or NFY binding are shown in red. (B) The consensus sequence (forward strand) for the *Hoxb4* NFY/YY1 motif. Shown below is a representation of the CR1 NFY/YY1 site. Nucleotides over which YY1 makes base-specific contacts in the major groove are highlighted on the upper strand. Similarly, nucleotides over which NFY makes base-specific contacts in the minor and major grooves are shown on the lower strand. Nucleotides that are predicted to enhance (green) or reduce (red) the affinity of either factor for its site are shown on the appropriate strand. Core nucleotides are shown in bold. (C) Predicted NFY sites from the *Hoxc8* early enhancer and the *Hox8/Hox7-Hox6* four cluster sequence (H8/7-6 FCS). Sites are shown in the reverse orientation with respect to transcription. The acquisition of alternative CCAAT boxes in the mouse and human *HoxC* cluster is underlined. Bold, lowercase and red nucleotides have equivalent meanings to those in A.

### The overlapping NFY/YY1 site

YY1 and NFY do not bind cooperatively to the *Hoxb4* sites. The CR1 NFY site contains a degenerate CCAAT box on each strand: on the sense strand with the core sequence CCAAT; and in the reverse orientation with the core sequence gCAAT. The other *Hoxb4* sites both contain a CCAAT motif on the sense strand and a perfect CCAAT motif in the reverse orientation. As the mutant YY1 site (sense=CCAgT) is still able to bind NFY efficiently, it is likely that NFY binds to the site in the reverse orientation and YY1 to the CCATT motif on the sense strand. However, as mutations that alter the core of the reverse site do not prevent NFY binding (b4Cm3 and b4CmNFY1; Fig. 2A,B and Fig. 4A), it seems likely that NFY can also bind to the forward sites at some level.

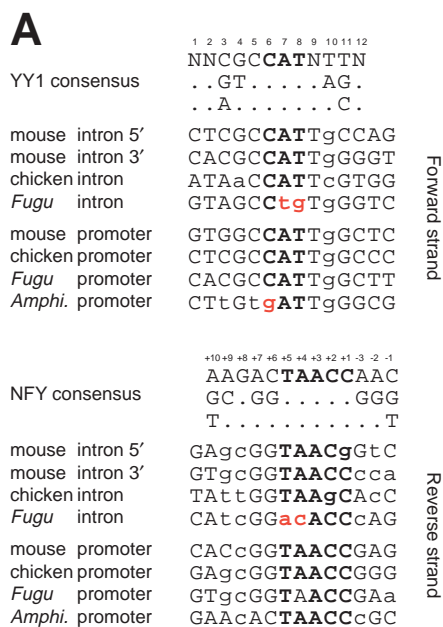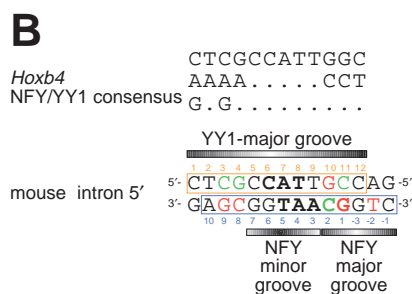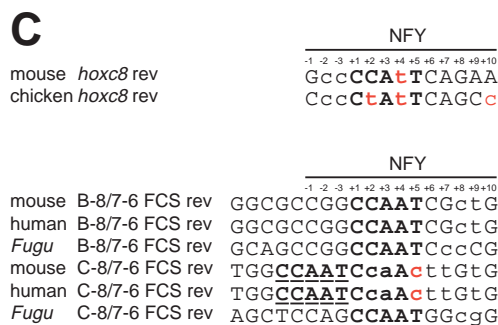

YY1 makes base specific contacts in the major groove (Hyde-DeRuyscher et al., 1995) while NFY makes key major groove interactions with the -2 to +2 bases and minor groove contacts over the +3 to +7 region (Ronchi et al., 1995). Based on the sequence of the CR1 site, it seems highly unlikely that both NFY and YY1 can bind simultaneously because of the requirement for common major groove interactions at positions 10/11 of the YY1 site and +1/+2 of the NFY site (Fig. 6B). By analysis of base preferences, it appears that the NFY/YY1 binding sites are highly interdependent (Fig. 6B). In the overlapping region, bases that are predicted to reduce the affinity of NFY interactions (G at +1, C at +8 and G at +9) are favoured by YY1. The converse is also true, as highlighted by the suboptimal G at position 10 of the YY1 site, and similar relationships exist for all three *Hoxb4* sites (data not shown). It would appear, therefore, that the NFY/YY1 site is a specialized motif that is able to bind either factor in a mutually exclusive fashion.

### The NFY/YY1 motif and the global regulation of *Hox* genes

We sought to find other examples where NFY sites of this class are conserved amongst Hox family members and uncovered a compelling example. Kim et al. (Kim et al., 2000) describe a highly conserved region in the intergenic region between PG-8/7 and PG-6 (H8/7-6 FCS, for Four Cluster Sequence) in all four vertebrate Hox clusters. We noted the presence of a highly conserved NFY site in the same transcriptional orientation as the *Hoxb4* sites (Fig. 6C). This strongly suggests that the NFY motif is, in general, an important regulatory feature of Hox genes. In the mouse and human Hox clusters the conserved CCAAT box is altered (CCAAT to CCAA $\zeta$ ), which should abolish, or drastically impair, NFY binding. However, immediately adjacent to this is an alternative CCAAT box that is not present in any of the other clusters, including *Fugu HoxC*. This suggests that the mammalian *HoxC* cluster has acquired this variation in the H8/7-6 FCS NFY site after its ancestral divergence from *Fugu*, approximately 430 million years ago, and argues that conservation of a CCAAT box at this position is important.

The mouse and chicken *Hoxc8* genes show a heterochronicity in their activation along the rostrocaudal axis. This correlates with a transposition of Hox gene boundaries in conjunction with morphological ones (Burke et al., 1995). The anterior boundaries of *Hoxc8* expression in mouse are at the level of So10 and So14 in the neural tube (nt) and paraxial mesoderm (pm), respectively (Belting et al., 1998). In a chick embryo at the same relative developmental stage, they lie at So14 (nt) and So20 (pm). A 399 bp regulatory region located 3 kb upstream of the mouse *Hoxc8* gene (the Early Enhancer) directs the early phase of *Hoxc8* expression in transgenic mice (Shashikant and Ruddle, 1996). When coupled to the *hsp68* promoter this enhancer, like region C, is able to direct expression in the neural tube and somites of transgenic embryos to levels that are several segments more posterior than the endogenous gene at 9.5 dpc. The replacement of a highly conserved segment with the corresponding chicken sequences (151 bp, 80% identity) results in a caudal shift of the anterior boundaries of enhancer activity by several further segmental units. In spite of this there appeared to be no significant difference in the sequences of five elements that have been

shown to be important for the activity of the mouse enhancer (Shashikant et al., 1995; Shashikant and Ruddle, 1996). We have noticed, however, that the mouse enhancer sequence contains a consensus NFY-binding site containing a CCA $\zeta$ T motif that is mutated in the chick enhancer to CTA $\zeta$ T (Fig. 6C). We propose that this subtle base alteration that removes an NFY binding site may provide an explanation for the caudal shift in expression.

In conclusion, we have shown that NFY is required for the regulated expression of *Hoxb4* in the mesoderm by binding to a site that is a common feature of multiple Hox gene regulatory regions. NFY is thus a newly identified upstream Hox gene regulatory factor. We suggest that NFY could act to stabilize and enhance the activating effects of other cell-type specific transcriptional regulators and maintain this state by the recruitment of chromatin modifying enzymes. The relative levels of NFY and YY1 binding could represent a mechanism for balancing activation and repression through the same site. This is intriguing in light of the recent discovery that the proper timing of Hoxd gene activation is controlled by a release from global repression of the entire cluster (Kondo and Duboule, 1999; Kmita et al., 2000b).

We thank Alistair Sterling for assistance with peptide sequencing, Christoph Benoist (IGBMC, Strasbourg) for the NFYA and NFYB antibodies, and Alistair Morrison/Robb Krumlauf (NIMR, Mill Hill) for the region C-*Hoxb4* promoter construct transgenic embryos. We are grateful to Hannah Boyes, Lorraine Jones and Zoë Webster for animal husbandry, and to members of the Rigby and Krumlauf laboratories for helpful discussion. J. G. and T. B. were supported by MRC Studentships, and M. V. by a Fellowship from the International Human Frontier Science Program. This work was funded by the Medical Research Council.

### REFERENCES

- Aparicio, S., Morrison, A., Gould, A., Gilthorpe, J., Chaudhuri, C., Rigby, P., Krumlauf, R. and Brenner, S. (1995). Detecting conserved regulatory elements with the model genome of the Japanese puffer fish, *Fugu rubripes*. *Proc. Natl. Acad. Sci. USA* **92**, 1684-1688.
- Bayarsaihan, D. and Ruddle, F. (2000). Isolation and characterization of BEN, a member of the TFII-I family of DNA-binding proteins containing distinct helix-loop-helix domains. *Proc. Natl. Acad. Sci. USA* **97**, 7342-7347.
- Bel-Vialar, S., Coré, N., Terranova, R., Goudot, V., Boned, A. and Djabali, M. (2000). Altered retinoic acid sensitivity and temporal expression of *Hox* genes in *Polycomb-M33*-deficient mice. *Dev. Biol.* **224**, 238-249.
- Belting, H. G., Shashikant, C. S. and Ruddle, F. H. (1998). Modification of expression and cis-regulation of *Hoxc8* in the evolution of diverged axial morphology. *Proc. Natl. Acad. Sci. USA* **95**, 2355-2360.
- Brown, J. L., Mucci, D., Whiteley, M., Dirksen, M. L. and Kassis, J. A. (1998). The *Drosophila* Polycomb group gene pleiohomeotic encodes a DNA binding protein with homology to the transcription factor YY1. *Mol. Cell* **1**, 1057-1064.
- Burke, A. C., Nelson, C. E., Morgan, B. A. and Tabin, C. (1995). Hox genes and the evolution of vertebrate axial morphology. *Development* **121**, 333-346.
- Charite, J., de Graaff, W., Vogels, R., Meijlink, F. and Deschamps, J. (1995). Regulation of the *Hoxb-8* gene: synergism between multimerized cis-acting elements increases responsiveness to positional information. *Dev. Biol.* **171**, 294-305.
- Charite, J., de Graaff, W., Consten, D., Reijnen, M. J., Korving, J. and Deschamps, J. (1998). Transducing positional information to the Hox genes: critical interaction of *cdx* gene products with position-sensitive regulatory elements. *Development* **125**, 4349-4358.
- Currie, R. A. (1998). NF-Y is associated with the histone acetyltransferases GCN5 and P/CAF. *J. Biol. Chem.* **273**, 1430-1434.

- Di Rocco, G., Gavalas, A., Popperl, H., Krumlauf, R., Mavilio, F. and Zappavigna, V. (2001). The recruitment of SOX/OCT complexes and the differential activity of HOXA1 and HOXB1 modulate the Hoxb1 autoregulatory enhancer function. *J. Biol. Chem.* **276**, 20506-20515.
- Donohoe, M. E., Zhang, X., McGinnis, L., Biggers, J., Li, E. and Shi, Y. (1999). Targeted disruption of mouse Yin Yang 1 transcription factor results in peri-implantation lethality. *Mol. Cell. Biol.* **19**, 7237-7244.
- Dorn, A., Bollekens, J., Staub, A., Benoist, C. and Mathis, D. (1987). A multiplicity of CCAAT box-binding proteins. *Cell* **50**, 863-872.
- Faust, C., Schumacher, A., Holdener, B. and Magnuson, T. (1995). The *eed* mutation disrupts anterior mesoderm production in mice. *Development* **121**, 273-285.
- Frontini, M., Imbriano, C., diSilvio, A., Bell, B., Bogni, A., Romier, C., Moras, D., Tora, L., Davidson, I. and Mantovani, R. (2002). NF-Y recruitment of TFIID: multiple interactions with histone fold TAF<sub>II</sub>S. *J. Biol. Chem.* **277**, 5841-5848.
- Geada, A. M., Gaunt, S. J., Azzawi, M., Shimeld, S. M., Pearce, J. and Sharpe, P. T. (1992). Sequence and embryonic expression of the murine Hox-3.5 gene. *Development* **116**, 497-506.
- Gilthorpe, J. D. and Rigby, P. W. J. (1999). Reporter genes for the study of transcriptional regulation in transgenic mouse embryos. *Methods Mol. Biol.* **97**, 159-182.
- Gould, A., Itasaki, N. and Krumlauf, R. (1998). Initiation of rhombomeric Hoxb4 expression requires induction by somites and a retinoid pathway. *Neuron* **21**, 39-51.
- Gould, A., Morrison, A., Sproat, G., White, R. A. and Krumlauf, R. (1997). Positive cross-regulation and enhancer sharing: two mechanisms for specifying overlapping Hox expression patterns. *Genes Dev.* **11**, 900-913.
- Greer, J. M., Puetz, J., Thomas, K. R. and Capecchi, M. R. (2000). Maintenance of functional equivalence during paralogous Hox gene evolution. *Nature* **403**, 661-665.
- Gutman, A., Gilthorpe, J. and Rigby, P. W. J. (1994). Multiple positive and negative regulatory elements in the promoter of the mouse homeobox gene Hoxb-4. *Mol. Cell. Biol.* **14**, 8143-8154.
- Haerry, T. E. and Gehring, W. J. (1997). A conserved cluster of homeodomain binding sites in the mouse Hoxa-4 intron functions in Drosophila embryos as an enhancer that is directly regulated by Ultrabithorax. *Dev. Biol.* **186**, 1-15.
- Herault, Y., Beckers, J., Gerard, M. and Duboule, D. (1999). Hox gene expression in limbs: colinearity by opposite regulatory controls. *Dev. Biol.* **208**, 157-165.
- Horan, G. S., Ramirez-Solis, R., Featherstone, M. S., Wolgemuth, D. J., Bradley, A. and Behringer, R. R. (1995). Compound mutants for the paralogous hoxa-4, hoxb-4, and hoxd-4 genes show more complete homeotic transformations and a dose-dependent increase in the number of vertebrae transformed. *Genes Dev.* **9**, 1667-1677.
- Hyde-DeRuyscher, R. P., Jennings, E. and Shenk, T. (1995). DNA binding sites for the transcriptional activator/repressor YY1. *Nucleic Acids Res.* **23**, 4457-4465.
- Jacobs, Y., Schnabel, C. A. and Cleary, M. L. (1999). Trimeric association of Hox and TALE homeodomain proteins mediates Hoxb2 hindbrain enhancer activity. *Mol. Cell. Biol.* **19**, 5134-5142.
- Jin, S. and Scotto, K. W. (1998). Transcriptional regulation of the MDR1 gene by histone acetyltransferase and deacetylase is mediated by NF-Y. *Mol. Cell. Biol.* **18**, 4377-4384.
- Kadonaga, J. T. and Tjian, R. (1986). Affinity purification of sequence-specific DNA binding proteins. *Proc. Natl. Acad. Sci. USA* **83**, 5889-5893.
- Keegan, L. P., Haerry, T. E., Crotty, D. A., Packer, A. I., Wolgemuth, D. J. and Gehring, W. J. (1997). A sequence conserved in vertebrate Hox gene introns functions as an enhancer regulated by posterior homeotic genes in Drosophila imaginal discs. *Mech. Dev.* **63**, 145-157.
- Kim, C. B., Amemiya, C., Bailey, W., Kawasaki, K., Mezey, J., Miller, W., Minoshima, S., Shimizu, N., Wagner, G. and Ruddle, F. (2000). Hox cluster genomics in the horn shark, *Heterodontus francisci*. *Proc. Natl. Acad. Sci. USA* **97**, 1655-1660.
- Kmita, M., Kondo, T. and Duboule, D. (2000a). Targeted inversion of a polar silencer within the HoxD complex re-allocates domains of enhancer sharing. *Nat. Genet.* **26**, 451-454.
- Kmita, M., van Der Hoeven, F., Zakany, J., Krumlauf, R. and Duboule, D. (2000b). Mechanisms of Hox gene colinearity: transposition of the anterior Hoxb1 gene into the posterior HoxD complex. *Genes Dev.* **14**, 198-211.
- Kondo, T. and Duboule, D. (1999). Breaking colinearity in the mouse HoxD complex. *Cell* **97**, 407-417.
- Kondo, T., Zakany, J. and Duboule, D. (1998). Control of colinearity in AbdB genes of the mouse HoxD complex. *Mol. Cell.* **1**, 289-300.
- Krumlauf, R. (1994). Hox genes in vertebrate development. *Cell* **78**, 191-201.
- Li, Q., Herrler, M., Landsberger, N., Kaludov, N., Ogrzyzko, V. V., Nakatani, Y. and Wolffe, A. P. (1998). Xenopus NF-Y pre-sets chromatin to potentiate p300 and acetylation-responsive transcription from the Xenopus hsp70 promoter in vivo. *EMBO J.* **17**, 6300-6315.
- Maconochie, M., Nonchev, S., Morrison, A. and Krumlauf, R. (1996). Paralogous Hox genes: function and regulation. *Annu. Rev. Genet.* **30**, 529-556.
- Maconochie, M., Krishnamurthy, R., Nonchev, S., Meier, P., Manzanares, M., Mitchell, P. J. and Krumlauf, R. (1999). Regulation of Hoxa2 in cranial neural crest cells involves members of the AP-2 family. *Development* **126**, 1483-1494.
- Maconochie, M. K., Nonchev, S., Manzanares, M., Marshall, H. and Krumlauf, R. (2001). Differences in Krox20-dependent regulation of Hoxa2 and Hoxb2 during hindbrain development. *Dev. Biol.* **233**, 468-481.
- Mahoney, C. W., Shuman, J., McKnight, S. L., Chen, H. C. and Huang, K. P. (1992). Phosphorylation of CCAAT-enhancer binding protein by protein kinase C attenuates site-selective DNA binding. *J. Biol. Chem.* **267**, 19396-19403.
- Manley, N. R. and Capecchi, M. R. (1997). Hox group 3 paralogous genes act synergistically in the formation of somitic and neural crest-derived structures. *Dev. Biol.* **192**, 274-288.
- Mantovani, R. (1998). A survey of 178 NF-Y binding CCAAT boxes. *Nucleic Acids Res.* **26**, 1135-1143.
- Mantovani, R. (1999). The molecular biology of the CCAAT-binding factor NF-Y. *Gene* **15**, 15-27.
- Manzanares, M., Cordes, S., Ariza-McNaughton, L., Sadl, V., Maruthainar, K., Barsh, G. and Krumlauf, R. (1999). Conserved and distinct roles of kreisler in regulation of the paralogous Hoxa3 and Hoxb3 genes. *Development* **126**, 759-769.
- McNabb, D. S., Xing, Y. and Guarente, L. (1995). Cloning of yeast HAP5: a novel subunit of a heterotrimeric complex required for CCAAT binding. *Genes Dev.* **9**, 47-58.
- Morrison, A., Chaudhuri, C., Ariza-McNaughton, L., Muchamore, I., Kuroiwa, A. and Krumlauf, R. (1995). Comparative analysis of chicken Hoxb-4 regulation in transgenic mice. *Mech. Dev.* **53**, 47-59.
- O'Carroll, D., Erhardt, S., Pagani, M., Barton, S. C., Surani, M. A. and Jenwein, T. (2001). The Polycomb-Group gene *Ezh2* is required for early mouse development. *Mol. Cell. Biol.* **21**, 4330-4336.
- Pirrotta, V. (1998). Polycomb-ing the genome: PcG, trxG, and chromatin silencing. *Cell* **93**, 333-336.
- Ronchi, A., Bellorini, M., Mongelli, N. and Mantovani, R. (1995). CCAAT-box binding protein NF-Y (CBF, CP1) recognizes the minor groove and distorts DNA. *Nucleic Acids Res.* **23**, 4565-4572.
- Satijn, D. P., Hamer, K. M., den Blaauwen, J. and Otte, A. P. (2001). The polycomb group protein EED interacts with YY1, and both proteins induce neural tissue in Xenopus embryos. *Mol. Cell. Biol.* **21**, 1360-1369.
- Shashikant, C. S. and Ruddle, F. H. (1996). Combinations of closely situated cis-acting elements determine tissue-specific patterns and anterior extent of early Hoxc8 expression. *Proc. Natl. Acad. Sci. USA* **93**, 12364-12369.
- Shashikant, C. S., Bieberich, C. J., Belting, H. G., Wang, J. C., Borbely, M. A. and Ruddle, F. H. (1995). Regulation of Hoxc-8 during mouse embryonic development: identification and characterization of critical elements involved in early neural tube expression. *Development* **121**, 4339-4347.
- Shi, Y., Lee, J. S. and Galvin, K. M. (1997). Everything you have ever wanted to know about Yin Yang 1. *Biochim. Biophys. Acta* **1332**, F49-F66.
- Sinha, S., Maity, S. N., Lu, J. and de Crombrugge, B. (1995). Recombinant rat CBF-C, the third subunit of CBF/NFY, allows formation of a protein-DNA complex with CBF-A and CBF-B and with yeast HAP2 and HAP3. *Proc. Natl. Acad. Sci. USA* **92**, 1624-1628.
- Tie, F., Furuyama, T., Prasad-Sinha, J., Jane, E. and Harte, P. J. (2001). The *Drosophila* polycomb group proteins ESC and E(Z) are present in a complex containing the histone-binding protein p55 and the histone deacetylase RPD3. *Development* **128**, 275-286.
- Valarche, I., de Graaff, W. and Deschamps, J. (1997). A 3' remote control region is a candidate to modulate Hoxb-8 expression boundaries. *Int. J. Dev. Biol.* **41**, 705-714.
- van der Hoeven, F., Zakany, J. and Duboule, D. (1996). Gene transpositions in the HoxD complex reveal a hierarchy of regulatory controls. *Cell* **85**, 1025-1035.
- van der Vlag, J. and Otte, A. P. (1999). Transcriptional repression mediated

- by the human polycomb-group protein EED involves histone-deacetylation. *Nat. Genet.* **23**, 474-478.
- van Lohuizen, M., Tijms, M., Voncken, J. W., Schumacher, A., Magnuson, T. and Wientjens, E.** (1998). Interaction of mouse Polycomb-group (Pc-G) proteins Enx1 and Enx2 with Eed: indication for separate Pc-G complexes. *Mol. Cell. Biol.* **18**, 3572-3579.
- Vogels, R., Charite, J., de Graaff, W. and Deschamps, J.** (1993). Proximal cis-acting elements cooperate to set Hoxb-7 (Hox-2.3) expression boundaries in transgenic mice. *Development* **118**, 71-82.
- Whiting, J., Marshall, H., Cook, M., Krumlauf, R., Rigby, P. W. J., Stott, D. and Alleman, R. K.** (1991). Multiple spatially specific enhancers are required to reconstruct the pattern of Hox-2.6 gene expression. *Genes Dev.* **5**, 2048-2059.
- Yee, S. P. and Rigby, P. W. J.** (1993). The regulation of myogenin gene expression during the embryonic development of the mouse. *Genes Dev.* **7**, 1277-1289.
- Zhang, F., Nagy Kovacs, E. and Featherstone, M. S.** (2000). Murine hoxd4 expression in the CNS requires multiple elements including a retinoic acid response element. *Mech. Dev.* **96**, 79-89.
- Zingg, J. M., Alva, G. P. and Jost, J. P.** (1991). Characterisation of a genomic clone covering the structural mouse MyoD1 gene and its promoter region. *Nucleic Acids Res.* **19**, 6433-6439.
